# Supplementary material
Source: publisher figshare collection journal article supplement (https://acs.figshare.com/ndownloader/files/20098934)
Supplement: Supplementary file 1 [file 20098934]

Supporting information for

# Temperature cycling induced deracemization (TCID) of $\text{NaClO}_3$ under the influence of $\text{Na}_2\text{S}_2\text{O}_6$

## AUTHOR NAMES

Manon Schindler<sup>†</sup>, Clément Brandel<sup>†</sup>, Woo-Sik Kim<sup>§</sup> and Gérard Coquerel<sup>\*†</sup>

## AUTHOR ADDRESS

<sup>†</sup> SMS, EA3233, Université de Rouen Normandie, 76821 Mont Saint Aignan, France.

<sup>§</sup> Kyung Hee University, Yongin-si Kiheung-ku Soechun-dong 1, Kyungki-do, Korea

### SI-I: Determination of the solubility curve of the $\text{NaClO}_3$ in water realized by refractometry method.

After the establishment of a calibration curve (plotted with nine solutions of known concentrations of  $\text{NaClO}_3$  in water, Figure), the refractive index of saturated solutions of  $\text{NaClO}_3$  in water at different temperature was measured and plotted to determine the solubility curve between 20 and 40°C.

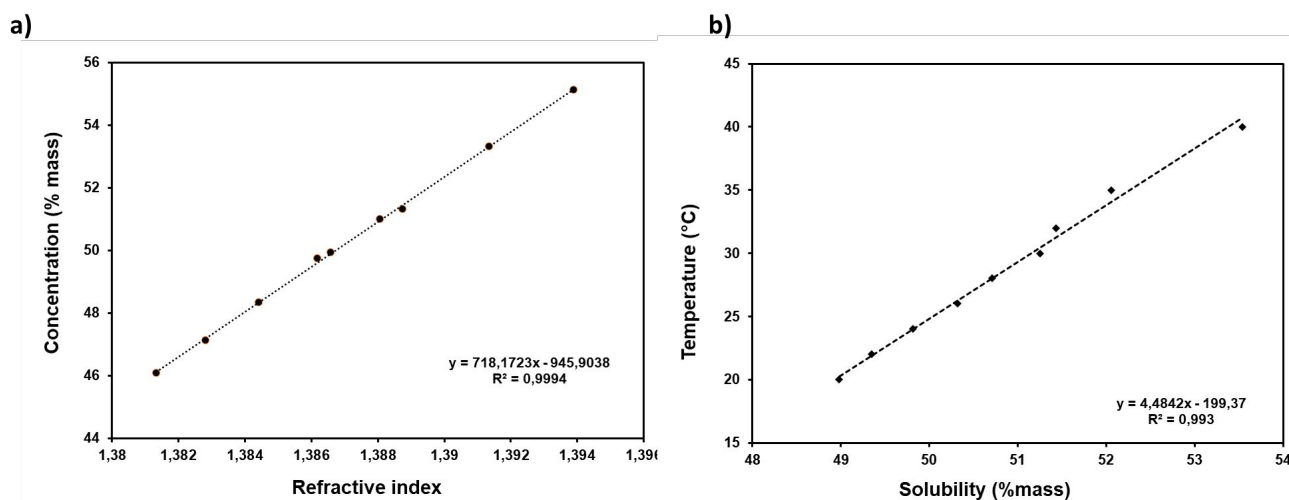

Figure I: a) Calibration curve of the refractive index as a function of the mass concentration of  $\text{NaClO}_3$  in water. b) Solubility curve of  $\text{NaClO}_3$  in water between 20 and 40°C.

SI-II: Log(ee) as a function of the time for Viedma ripening and TCID experiments (Figure II). Table I details the linear regressions of the curves.

### a) Viedma ripening

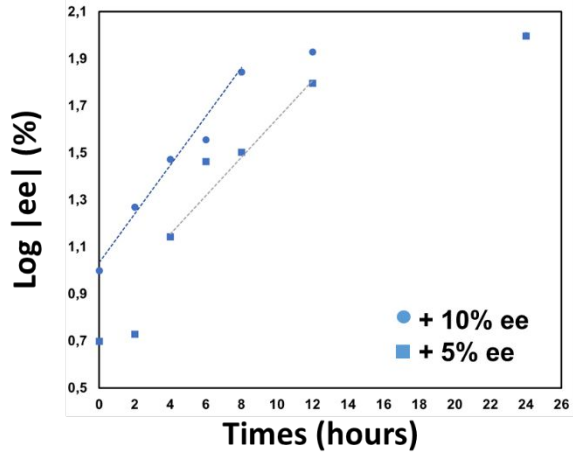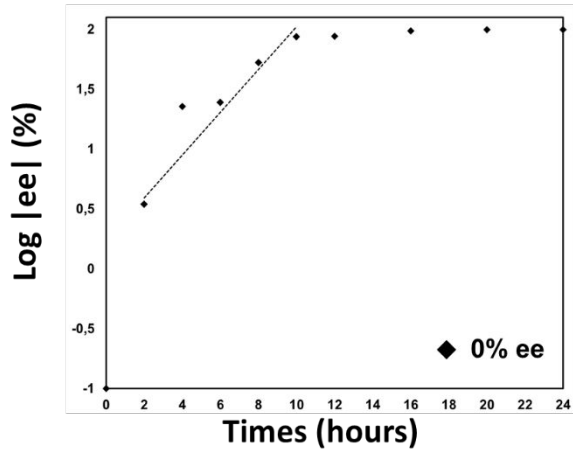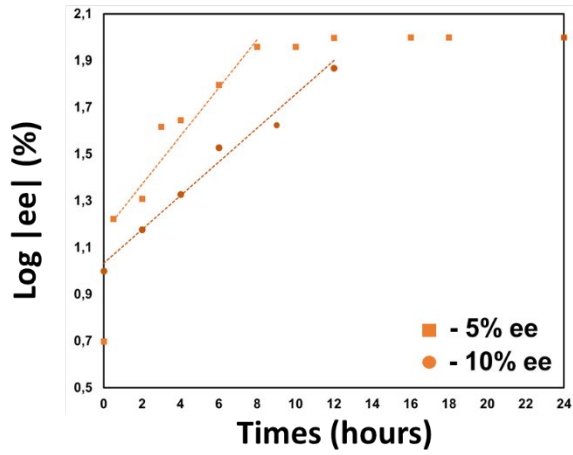

### b) TCID

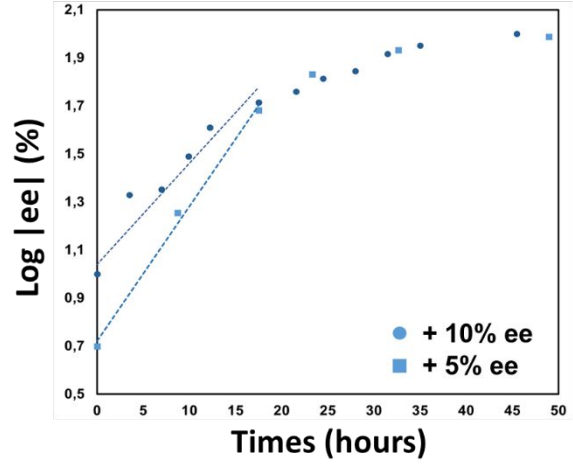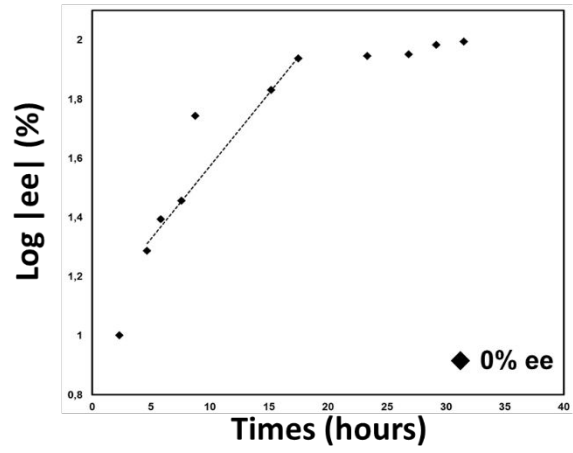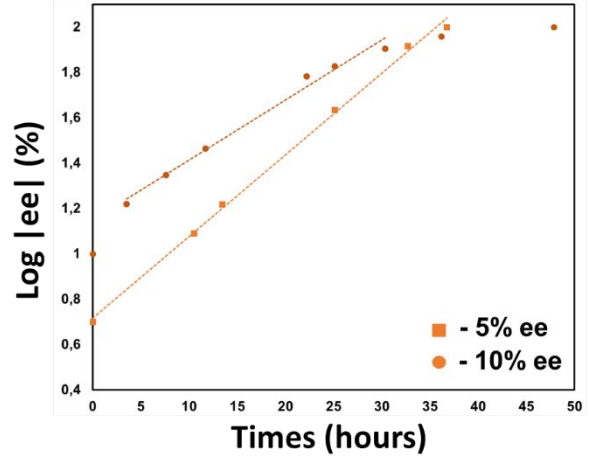

Figure II: Evolution of the  $\text{log } |ee| \text{ (%)}$  as a function of the time of a) VR experiments and b) TCID experiments. The line is the linear regression, detailed in table I. Inlay indicates the starting  $ee_{\text{crystal}}$ .

Table I: Summary of linear regressions of the VR deracemization experiments (left) and TCID deracemization experiments (right)

| ee initial | Viedma Ripening                          |         | TCID                                     |        |
|------------|------------------------------------------|---------|------------------------------------------|--------|
|            | Linear regression                        | $r^2$   | Linear regression                        | $r^2$  |
| - 10%      | $\text{Log }  ee  = 0.0722 * t + 1.0329$ | 0.9869  | $\text{Log }  ee  = 0.0265 * t + 1.148$  | 0.9875 |
| - 5%       | $\text{Log }  ee  = 0.1035 * t + 1.1621$ | 0.9757  | $\text{Log }  ee  = 0.036 * t + 0.7159$  | 0.9977 |
| 0%         | $\text{Log }  ee  = 0.1786 * t + 0.2383$ | 0.9823  | $\text{Log }  ee  = 0.0492 * t + 1.0821$ | 0.9960 |
| 5%         | $\text{Log }  ee  = 0.0815 * t + 0.8291$ | 0.9967  | $\text{Log }  ee  = 0.0561 * t + 0.7207$ | 0.9942 |
| 10%        | $\text{Log }  ee  = 0.0986 * t + 1.0338$ | 0.98039 | $\text{Log }  ee  = 0.0421 * t + 1.0401$ | 0.9684 |

SI-III: Log(ee) as a function of the time for TCID experiments in presence of  $\text{Na}_2\text{S}_2\text{O}_6$  (Figure III) and details of the linear regressions of those curves (Table II).

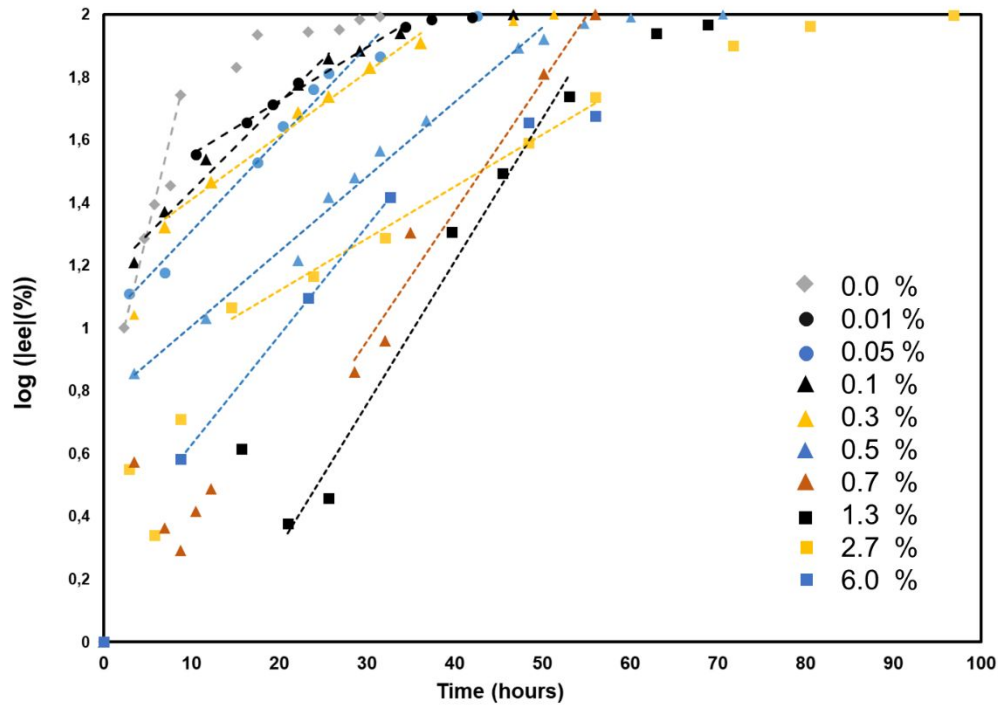

Figure III: Evolution of the  $\log |ee|(\%)$  as a function of the time of TCID experiments in presence of  $\text{Na}_2\text{S}_2\text{O}_6$ . The line is the linear regression, detailed in table II. Inlay indicates the starting %mol of  $\text{Na}_2\text{S}_2\text{O}_6$ .

Table II: Summary of linear regressions of the VR deracemization experiments (left) and TCID deracemization experiments (right)

| %mol Na <sub>2</sub> S <sub>2</sub> O <sub>6</sub> | Linear regression              | r <sup>2</sup> |
|----------------------------------------------------|--------------------------------|----------------|
| 0%                                                 | Log  ee  = 0.0492 * t + 1.0821 | 0.9960         |
| 0.01%                                              | Log  ee  = 0.0171 * t + 1.3838 | 0.9922         |
| 0.05%                                              | Log  ee  = 0.0294 * t + 1.0169 | 0.9778         |
| 0.1%                                               | Log  ee  = 0.028 * t + 1.1585  | 0.9812         |
| 0.3%                                               | Log  ee  = 0.0203 * t + 1.2091 | 0.9884         |
| 0.5%                                               | Log  ee  = 0.0238 * t + 0.7698 | 0.9877         |
| 0.7%                                               | Log  ee  = 0.0414 * t - 0.2851 | 0.9711         |
| 1.3%                                               | Log  ee  = 0.0457 * t + 0.6135 | 0.9813         |
| 2%                                                 | Log  ee  = 0.0166 * t + 0.7897 | 0.9905         |
| 6%                                                 | Log  ee  = 0.0349 * t + 0.2783 | 0.9999         |

**SI-IV: Study of the speed of surface development of a single crystal of NaClO<sub>3</sub> during crystal growth experiments.**

Gs, defined by the Equation I, where A<sub>final</sub> and A<sub>initial</sub> are the area of the single crystals at the beginning and at the end of the cooling profile (**Error! Reference source not found.**), and t, the time required to cool from 40 to 26 °C (i.e., 15 min).

$$Gs = \frac{(A_{final} - A_{initial})}{t} \text{ Equation I}$$

Table III: Growth rate of NaClO<sub>3</sub> crystals during growth rate experiments in contaminated saturated solution as a function of the %mol of Na<sub>2</sub>S<sub>2</sub>O<sub>6</sub>

| %mol Na <sub>2</sub> S <sub>2</sub> O <sub>6</sub> | Area <sub>initial</sub><br>(μm <sup>2</sup> ) | Area <sub>Final</sub><br>(μm <sup>2</sup> ) | Growth<br>(μm <sup>2</sup> /min) |
|----------------------------------------------------|-----------------------------------------------|---------------------------------------------|----------------------------------|
| 0                                                  | 3573132                                       | 5527192                                     | <b>130271</b>                    |
| 0.1                                                | 3830786                                       | 4355030                                     | <b>34950</b>                     |
| 0.5                                                | 2491196                                       | 2831494                                     | <b>22687</b>                     |
| 2                                                  | 4907637                                       | 5638282                                     | <b>48710</b>                     |
